# Supplementary material for: Human Vaginal Lactobacillus -Derived (-)-Terpinen-4-ol restores antibiotic sensitivity by inhibiting efflux pumps in drug resistant E. coli and K. pneumoniae
Source: Research Square preprint supplement (doi:10.21203/rs.3.rs-5122361/v1), 2025-05-08
Supplement: Supplementary file 1 [file 9831ea92d4893cc19bb33380.docx]

**SUPPLEMENTARY**

**Human Vaginal *Lactobacillus* *jensenii* -Derived (-)-Terpinen-4-ol restores antibiotic sensitivity by inhibiting efflux pumps in drug resistant *E. coli and K. pneumoniae***

**Veena G Nair 1, Vineetha K Unnikrishnan1, Niraimathi Muralidharan1, Badri Narayanan S V1, Rene Christena L2, Y.B.R.D Rajesh3, Dhiviya Narbhavi4, Anupriya A5, Prabhusaran N6,, Saisubramanian Nagarajan 1***

* **Corresponding Author:** Dr Saisubramanian Nagarajan, Antimicrobial Resistance Lab, Centre for Research in Infectious diseases, School of Chemical and Biotechnology, SASTRA Deemed to be University, Thanjavur 613401, Tamil Nadu, India. Phone: +91 4362 2641011

email: [sai@scbt.sastra.edu](mailto:sai@scbt.sastra.edu)

1Antimicrobial Resistance Lab, Centre for Research in Infectious diseases, School of Chemical and Biotechnology, SASTRA Deemed to be University, Thanjavur 613401, Tamil Nadu, India.

2 Formerly with the Antimicrobial Resistance Lab, Centre for Research in Infectious diseases, School of Chemical and Biotechnology, SASTRA Deemed to be University, Thanjavur 613401, Tamil Nadu, India.

3 Department of Chemistry, School of Chemical and Biotechnology, SASTRA Deemed University, Thanjavur – 613 401, Tamil Nadu, India.

4 Assistant Professor, Department of Obstetrics and Gynaecology, TSRMMCH&RC, Tiruchirappalli, Tamil Nadu, India

5 Associate Professor, Department of Microbiology, TSRMMCH&RC, Tiruchirappalli, Tamil Nadu, India

6 Research Faculty, Institutional Research Board TSRMMCH&RC, Tiruchirappalli, Tamil Nadu, India


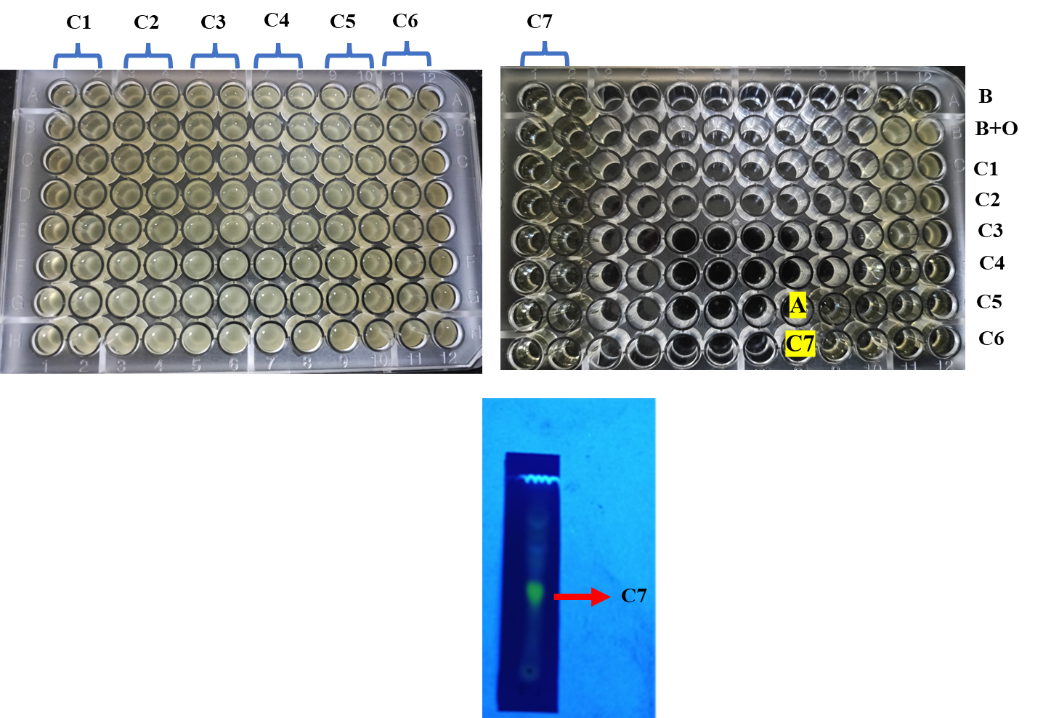


A Screening and Characterization of Cell free supernatant, C1- C7 were Compound 1 to Compound 7 **A)** TLC plate after Column chromatography

B Screening and Characterization of Cell free supernatant, C1- C7 were Compound 1 to Compound 7 **A)** TLC plate after Column chromatography

**Fig. S1 Screening and Characterization of Cell free supernatant,** C1- C7 were Compound 1 to Compound 7 A) Screening of the compounds for efflux activity, where C7 marked in red square shows efflux activity against *K. pneumonaie* MTCC 432 B) TLC plate after Column chromatography.


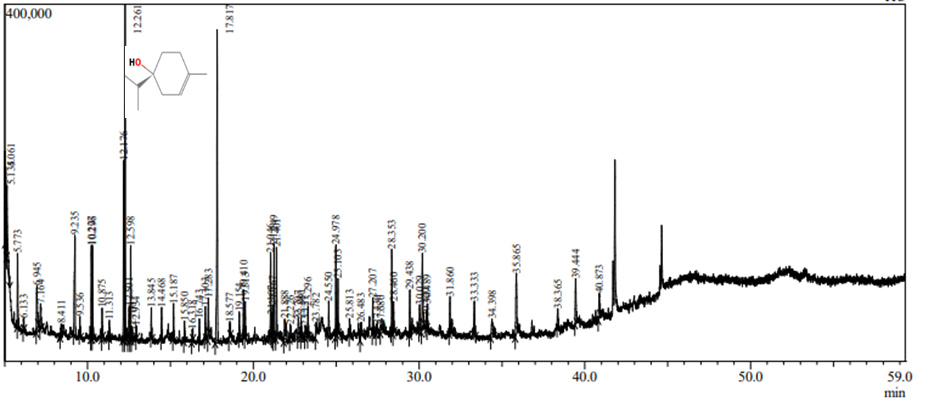


**Fig.** **S2:** **Gas Chromatography-Mass Spectrometry (GC-MS) of Compound 7(C7).** The highest peak with R. time12.261 indicates the compound is Terpinen-4-ol.


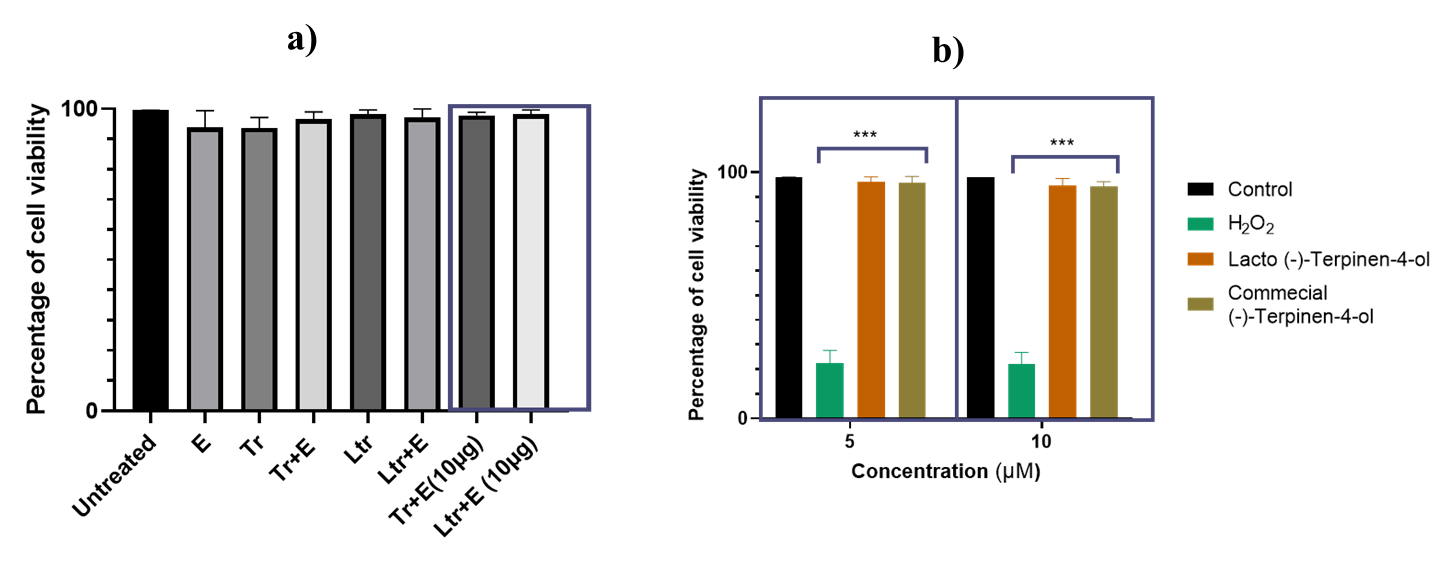


**Fig.** **S3. MTT assay showing survival of human urinary bladder cancer cells T24 and Raw Macrophages** upon incubation with (-)-Terpinen-4-ol (Commercial (Tr) and Extracted(Ltr)) and in combination with erythromycin (E) (n=3). The experiment was performed in triplicates and the error bar represents standard error of the mean.

**Fig.** **S4 Effect of Terpinen-4-ol and Erythromycin on biofilm formation**. Impact of terpinen-4-ol, both alone and in combination with erythromycin, on the formation of mature biofilms. The y-axis represents the biofilm biomass quantified by crystal violet staining, while the x-axis indicates different treatment groups: untreated control, terpinen-4-ol alone (Ltr-Lactobacillus derived, Tr- Commercial), Ery- erythromycin alone, and the combination of terpinen-4-ol and erythromycin. Unpaired t-test, n= 3, 95% CI, p*** < 0.0001

| Minimum Inhibitory Concentration (μg/ml) | | | | | | | | | | |  | |  | |  |
| --- | --- | --- | --- | --- | --- | --- | --- | --- | --- | --- | --- | --- | --- | --- | --- |
| **Antibiotic** | ***K. p*  MTCC 432** | ***K. p* BC936** | ***K. p* BC1415** | ***K. p* 1876** | ***K. p* 44350** | ***K. p* 44357** | ***K. p* 15410** | ***K. p* 27736** | ***E. coli* U1007** | ***E. coli***  ***UTI89*** | | ***E. coli***  ***CFT073*** | | ***E. coli***  ***F11*** | |
| Kanamycin | >256 | >128 | >128 | >256 | >256 | 32 | >256 | <4 | >128 | 16 | | 32 | | 32 | |
| Ceftriaxone | <1 | >128 | >128 | >256 | >256 | >256 | >256 | <4 | >128 | <4 | | <4 | | <4 | |
| Tetracycline | >128 | >128 | >128 | <4 | <4 | 128 | <4 | <4 | >128 | <4 | | <4 | | <4 | |
| Streptomycin | 64 | 32 | 32 | 16 | 128 | 128 | 128 | 16 | 128 | <4 | | <4 | | <4 | |
| Colistin | 2 | 8 | 32 | 4 | >4 | <4 | 8 | <4 | 4 | <4 | | <4 | | <4 | |
| Meropenem | 0.5 | 16 | 16 | 8 | 128 | 128 | 256 | >4 | >128 | <4 | | <4 | | <4 | |
| Levofloxacin | 1 | 32 | 32 | 128 | 128 | 128 | 64 | <4 | 32 | <4 | | <4 | | <4 | |
| Ciprofloxacin | 4 | 16 | 16 | >256 | >256 | >256 | 128 | <4 | >128 | <4 | | <2 | | 4 | |
| **Erythromycin** | **64** | **>128** | **>128** | **>128** | **>128** | **>128** | **>128** | **>128** | **>128** | **256** | | **256** | | **64** | |
| Norfloxacin | <2 | >128 | 64 | 32 | >128 | >128 | >128 | 32 | >128 | <4 | | <2 | | <4 | |
| Amikacin | <2 | >128 | >128 | 16 | >4 | >128 | >128 | 16 | >128 | 8 | | 16 | | 16 | |
| Gentamicin | <4 | >128 | >128 | >128 | >128 | >128 | >128 | >128 | >128 | <4 | | 4 | | <4 | |
| Rifampicin | 4 | >128 | >128 | 16 | >128 | >128 | >128 | 16 | 32 | 32 | | 16 | | 16 | |

**Table** **S1: Drug resistance profile of clinical isolates of *K. pneumoniae* and *E. coli ,* where erythromycin showed resistance to all the strains( in red)**


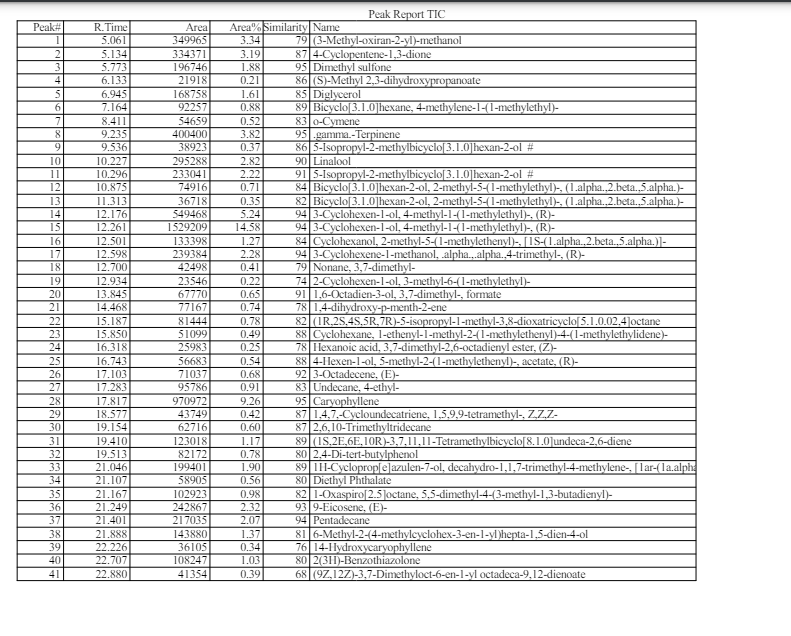


**Table** **S2**: Gas Chromatography-Mass Spectrometry (GC-MS) of Compound 7(C7). The peak analysis shows that the compound is (-)-Terpinen-4-ol (Indicated in red box)

| **Organisms** | **Antibiotic** | **MIC (**μg/ml) | **MIC Reversal (**μg/ml) | **Fold** |
| --- | --- | --- | --- | --- |
| *Staphylococcus aureus* 160018 | Norfloxacin | 128 | 8 | 16 |
| *Staphylococcus aureus* 160031 | Norfloxacin | >256 | 8 | 32 |
| *Staphylococcus aureus* 16001 | Norfloxacin | 128 | 4 | 32 |
| MRSA | Vancomycin  Tigecycline | 128  64 | 4  16 | 32  4 |
| *E. faecalis* | Ampicillin | 256 | 4(done up to) | 64 |
| *Acinetobacter baumanii* 1467 | Colistin  Ciprofloxacin | >256  >256 | >256 (no reversal)  8 | 32 |
| *Klebsiella pneumoniae* 474 | Erythromycin  Ciprofloxacin | >256  128 | 8  4 | 32  32 |
| *Pseudomonas aeruginosa E355* | Ciprofloxacin  Gentamicin | >256  128 | 8  >128 (no reversal) | 32 |
| *Pseudomonas aeruginosa* BC934 | Ciprofloxacin  Gentamicin | >256  128 | 16  >128 (no reversal) | 16 |
| *Pseudomonas aeruginosa* BC1640 | Ciprofloxacin  Gentamicin | >256  128 | 8  8 | 32  16 |

**Table** **S3.** Fold reversal of Minimum Inhibitory Concentration (MIC) of antibiotics in clinically relevant pathogens

| **Gene** | **Primers (5`-3`)** | **Ref** |
| --- | --- | --- |
| ***acrA*** | GTCCTCAGGTCAGTGGCATTA  ATTGCTCTGCTGCGCCGTTG | 69 |
| ***oqxA*** | AAGGTGCTGGTGAAGTCGATC  GCGCGATAGGTTCTGTCATC | 69 |
| ***kexC*** | TGCCGGTTGAACAGTATCCC  ACATCAGGTTATCGAGGCCG | 69 |
| ***kexD*** | ACCGGTTGCGCAATACCCTG  CGTAATTGACGCCATCCCTG | 69 |
| ***kexE*** | TTACGCTTCAGGATGATACCG  GGTCCATGTCGTGAACAGC | 69 |

**Table.** **S4: Primers used in gene expression study**
